# Supplementary material for: Tofacitinib for the Treatment of Ulcerative Colitis: An Integrated Summary of up to 7.8 Years of Safety Data from the Global Clinical Programme
Source: PubMed Central journal article supplement — J Crohns Colitis. 2022 Sep 17;17(3):338–51. doi: 10.1093/ecco-jcc/jjac141 (PMC10069618; doi:10.1093/ecco-jcc/jjac141), 2022-09-17
Supplement: jjac141_suppl_supplementary_data.pdf [file jjac141_suppl_supplementary_data.pdf]

## 1 **Supplementary Data**

### 2 *Supplementary methods*

#### 3 *Patient populations and study designs*

4 Full study design details of all studies included in this analysis have been published  
5 previously,<sup>1-5</sup> and are summarized in Supplementary Figure 1. Briefly, patients in the 8-week  
6 phase 2 induction study were randomized to receive placebo or tofacitinib 0.5, 3, 10, or  
7 15 mg twice daily [BID]; this analysis includes only those patients who received placebo or  
8 tofacitinib 10 mg BID. Oral mesalamine or oral prednisone [ $\leq 30$  mg/day] were allowed  
9 during the phase 2 study.<sup>1</sup>

10 Patients in the 8-week OCTAVE Induction 1 and 2 studies received placebo or  
11 tofacitinib 10 mg BID; concomitant therapy with oral aminosalicylates or corticosteroids  
12 [prednisone or prednisone equivalent,  $\leq 25$  mg/day] were allowed during OCTAVE Induction  
13 1 and 2, but azathioprine, methotrexate, 6-mercaptopurine, and tumor necrosis factor  
14 inhibitors [TNFi] were prohibited. Patients entering 52-week OCTAVE Sustain maintenance  
15 study were re-randomized to placebo, tofacitinib 5 mg BID, or tofacitinib 10 mg BID;  
16 patients could remain on stable doses of concomitant medications, per protocol, although  
17 tapering of corticosteroids was mandatory upon entry into the study [any patient who  
18 experienced worsening signs or symptoms of ulcerative colitis [UC] attributable to  
19 corticosteroid dose reduction could have a one-time increase in their corticosteroid dosage  
20 during the study, after which corticosteroid taper would be resumed in order to achieve  
21 steroid-free status].<sup>2</sup> In OCTAVE Open, those patients in remission at Week 52 of OCTAVE  
22 Sustain received tofacitinib 5 mg BID and all other patients received tofacitinib 10 mg BID.  
23 Corticosteroid tapering was required in OCTAVE Open, although doses  $\leq 10$  mg/day were

24 permitted for patients who could not tolerate tapering of their corticosteroid dose.<sup>3,6</sup> Patients  
25 in OCTAVE Open who were in stable remission for  $\geq 6$  months after receiving tofacitinib  
26 10 mg BID for  $\geq 2$  years were eligible to enter the double-blind, randomized RIVETING  
27 study, and received either tofacitinib 5 or 10 mg BID. Patients entering RIVETING were also  
28 required to have not received corticosteroids for UC for  $\geq 4$  weeks prior to baseline;  
29 corticosteroids were not permitted.<sup>4</sup>

### 30 *Analysis cohorts*

31 For contextualization of data in the Overall plus P3b/4 [2020] Cohort, data from three cohorts  
32 included in a previous integrated analysis [Induction, Maintenance, and Overall Cohorts] are  
33 also reported.<sup>5</sup> Briefly, the Induction Cohort comprised patients who received placebo or  
34 tofacitinib 10 mg BID in phase 2/3 induction studies for up to 8 weeks; the Maintenance  
35 Cohort comprised patients who received placebo or tofacitinib 5 or 10 mg BID in the phase 3  
36 maintenance study for up to 52 weeks; and the Overall Cohort comprised patients who  
37 received  $\geq 1$  dose of tofacitinib 5 or 10 mg BID in any phase 2/3/open-label, long-term  
38 extension study, and included data from OCTAVE Open as of December 16, 2016 [total  
39 tofacitinib exposure  $\leq 4.4$  years; hereafter defined as the Overall [Dec 2016] Cohort].

### 40 *Assessment of safety*

41 Adverse events [AEs] and serious AEs were coded using Medical Dictionary for Regulatory  
42 Activities [MedDRA; v19.0 (Induction and Maintenance Cohorts); v19.1 (Overall [Dec 2016]  
43 Cohort); v23.0 (Overall plus P3b/4 [2020] Cohort)]. Serious AEs were defined as any events  
44 that resulted in death, were life-threatening, resulted in a significant or persistent disability or  
45 incapacity, required patient hospitalization or prolongation of existing hospitalization, or  
46 resulted in a birth defect or congenital anomaly. Serious infections were defined as infection  
47 events that required parenteral antimicrobial therapy, hospitalization, or met criteria that

48 required the infection to be classified as a serious AE. Patients with serious infections were  
49 required to discontinue the studies [with appropriate follow-up].

50           Disseminated herpes zoster [HZ] events were those that involved >6 dermatomes  
51 [diffuse rash], or had non-skin involvement [e.g., pneumonia, encephalitis]. Multidermatomal  
52 HZ events were those that involved non-adjacent or >2 adjacent dermatomes [not classified  
53 as disseminated]. Gastrointestinal perforation excluded preferred terms of pilonidal cyst,  
54 perirectal abscess, rectal abscess, anal abscess, perineal abscess, and any preferred terms  
55 containing the term fistula.

56           Laboratory abnormalities evaluated in the Overall plus P3b/4 [2020] Cohort included  
57 creatine kinase elevation, anemia, lymphopenia, neutropenia, acute renal failure, and  
58 rhabdomyolysis. Laboratory abnormalities were reported by preferred term, but were not  
59 confirmed events (defined as two consecutive values on different study visit dates). Creatine  
60 kinase elevation included any event coded to the MedDRA preferred term blood creatine  
61 phosphokinase increased. Lymphopenia included any event coded to the preferred terms  
62 lymphopenia and lymphocytopenia neonatal, B-lymphocyte count decreased, lymphocyte  
63 count decreased, or T-lymphocyte count decreased. Neutropenia included any event coded to  
64 the higher-level term neutropenia, or the preferred terms granulocyte count decreased or  
65 neutrophil count decreased. AEs of anemia, renal impairment, and rhabdomyolysis were  
66 analyzed based on events coded to the Standardized MedDRA Queries [SMQs] of  
67 hematopoietic erythropenia, acute renal failure, and rhabdomyolysis/myopathy, respectively.  
68 As the SMQ of acute renal failure could include a broad variety of AEs, all AEs identified by  
69 this SMQ were then reviewed for clinical relevance.

70 *Statistical analyses*

71 For all cohorts, proportions and incidence rates [IRs; unique patients with events per  
72 100 patient-years of exposure] along with 95% confidence intervals [CIs] were calculated for  
73 deaths and AEs of special interest. For deaths, malignancies [excluding non-melanoma skin  
74 cancer (NMSC)], NMSC, and major adverse cardiovascular events, calculation of IRs  
75 included all events; for other AEs of special interest, events occurring >28 days after the last  
76 dose of study treatment were not included in the calculation of IRs; 95% CIs for IRs were  
77 computed using the Exact Poisson method.<sup>7</sup> The denominator for calculation of IRs was the  
78 exposure [in days] accrued from the date of the first dose of tofacitinib to the date of the last  
79 dose of tofacitinib [on or before the data cut-off date, or the last dose plus 28 days for patients  
80 who discontinued prematurely], or to the date of the first event, whichever occurred earlier.  
81 Events occurring within 28 days of study discontinuation were included in the numerator.  
82 Data from the phase 2 induction study were not included in the calculation of IRs for  
83 adjudicated events, as the phase 2 induction study took place prior to the establishment of the  
84 adjudication committees. Venous thromboembolic events included adjudicated events from  
85 OCTAVE Open and RIVETING plus select events from phase 2/3 studies from the Narrow  
86 Standardized MedDRA query for embolic and thrombotic events.

87 *Risk factor analysis*

88 Cox proportional regression models were used to assess the association of demographic and  
89 clinical factors with the risk of AEs of special interest. Models were applied to the Overall  
90 plus P3b/4 [2020] Cohort, which included all patients exposed to tofacitinib in the UC  
91 clinical program and excluded any time periods and events experienced while receiving  
92 placebo. Candidate baseline covariates included age [continuous and categorical], sex, race,  
93 geographical region [two analyses: North America, Europe, other (categorical); Asia, rest of

94 the world (categorical)], weight [continuous and categorical], body mass index [continuous  
95 and categorical], history of diabetes mellitus, duration of UC [continuous and categorical],  
96 prior TNFi treatment, prior TNFi failure, prior immunosuppressant treatment, prior  
97 corticosteroid use, oral corticosteroid use, corticosteroid dose group, high-density lipoprotein  
98 [categorical], total Mayo score [continuous and categorical], prior myocardial infarction,  
99 smoking status, prior NMSC, absolute lymphocyte count [continuous], and absolute  
100 neutrophil count [continuous]. In addition, tofacitinib predominant dose [tofacitinib 5 or 10  
101 mg BID, based on average total daily dose  $<15$  or  $\geq 15$  mg, respectively] was also included in  
102 the analysis as a candidate covariate. If multiple continuous covariates were highly  
103 correlated, only one was retained in the model in order to avoid problems with collinearity.  
104 The modeling approach for baseline characteristics first applied univariate models to identify  
105 individual risk factors with a statistically significant relationship to each AE; factors with  $p <$   
106  $0.10$  were then included in a stepwise multivariable model. The final model included all  
107 factors from the stepwise model with  $p < 0.05$ . No adjustment of  $p$  values was made for  
108 multiple comparisons.

109 **Supplementary Table 1.** Proportions of patients in the Overall plus P3b/4 [2020] Cohort  
 110 with tofacitinib exposure over time

| <b>Exposure time, <i>n</i> [%]</b> | <b>PD tofacitinib<br/>5 mg BID<br/>[<i>N</i> = 202]</b> | <b>PD tofacitinib<br/>10 mg BID<br/>[<i>N</i> = 955]</b> | <b>Tofacitinib All<br/>[<i>N</i> = 1157]</b> |
|------------------------------------|---------------------------------------------------------|----------------------------------------------------------|----------------------------------------------|
| <2 years                           | 57 [28.2]                                               | 548 [57.4]                                               | 605 [52.3]                                   |
| ≥2 years                           | 145 [71.8]                                              | 407 [42.6]                                               | 552 [47.7]                                   |
| ≥3 years                           | 130 [64.4]                                              | 347 [36.4]                                               | 477 [41.2]                                   |
| ≥4 years                           | 109 [54.0]                                              | 303 [31.7]                                               | 412 [35.6]                                   |
| ≥5 years                           | 89 [44.1]                                               | 200 [20.9]                                               | 289 [25.0]                                   |
| ≥6 years                           | 34 [16.8]                                               | 67 [7.0]                                                 | 101 [8.7]                                    |

111 BID, twice daily; *N*, number of patients treated in the treatment group; *n*, number of unique patients in each  
 112 category; PD, predominant dose.

113 **Supplementary Table 2.** Univariate regression analysis of risk factors for serious infections  
 114 in the Overall plus P3b/4 [2020] Cohort

| <b>Covariate</b>                          | <b>HR [95% CI]</b> | <b>p value</b> |
|-------------------------------------------|--------------------|----------------|
| Age, years [10-year increments]           | 1.09 [0.89–1.32]   | 0.4190         |
| Age, years [continuous]                   | 1.01 [0.99–1.03]   | 0.4190         |
| Age, <65 vs ≥65 years                     | 0.88 [0.32–2.44]   | 0.8013         |
| Age, years [range]                        |                    | 0.3458         |
| ≥30–<40 vs ≥40–<50                        | 1.66 [0.74–3.74]   |                |
| ≥30–<40 vs <30                            | 2.14 [0.84–5.44]   |                |
| ≥30–<40 vs ≥50                            | 1.20 [0.62–2.34]   |                |
| ≥40–<50 vs <30                            | 1.29 [0.46–3.63]   |                |
| ≥40–<50 vs ≥50                            | 0.72 [0.33–1.61]   |                |
| <30 vs ≥50                                | 0.56 [0.22–1.42]   |                |
| Sex, female vs male                       | 1.55 [0.89–2.69]   | 0.1239         |
| Body weight, kg [continuous]              | 1.01 [0.99–1.03]   | 0.2662         |
| Body weight, kg [<90 vs ≥90]              | 0.54 [0.29–1.01]   | 0.0539         |
| <b>BMI, kg/m<sup>2</sup> [continuous]</b> | 1.05 [1.00–1.10]   | <b>0.0355</b>  |
| BMI, kg/m <sup>2</sup> [range]            |                    | 0.5022         |
| ≥25–<30 vs <25                            | 0.95 [0.48–1.86]   |                |
| ≥25–<30 vs ≥30                            | 0.64 [0.28–1.48]   |                |
| <25 vs ≥30                                | 0.67 [0.33–1.39]   |                |
| Geographic region                         |                    |                |
| North America/Europe/other                |                    | 0.0600         |
| North America vs Europe                   | 2.11 [1.09–4.06]   |                |
| North America vs other                    | 1.20 [0.57–2.52]   |                |
| Europe vs other                           | 0.57 [0.29–1.13]   |                |
| Asia vs Rest of the World                 | 0.87 [0.34–2.19]   | 0.7679         |
| Race                                      |                    |                |
| Asian vs non-Asian                        | 0.91 [0.39–2.14]   | 0.8268         |
| White vs non-White                        | 0.82 [0.43–1.56]   | 0.5395         |
| Race [comparison]                         |                    | 0.2228         |
| Asian vs Black                            | 163361.9 [0.00–NA] |                |
| Asian vs White                            | 0.95 [0.40–2.25]   |                |
| Asian vs other                            | 0.36 [0.11–1.17]   |                |
| Black vs White                            | 0.00 [0.00–NA]     |                |
| Black vs other                            | 0.00 [0.00–NA]     |                |
| Other vs White                            | 2.67 [1.05–6.77]   |                |
| Smoking status                            |                    | 0.1865         |
| Ex-smoker vs never smoked                 | 1.62 [0.92–2.84]   |                |

|                                                                   |                    |        |
|-------------------------------------------------------------------|--------------------|--------|
| Ex-smoker vs smoker                                               | 2.78 [0.37–20.63]  |        |
| Never smoked vs smoker                                            | 1.72 [0.23–12.65]  |        |
| Disease duration years [ $<6.3$ vs $\geq 6.3$ years] <sup>a</sup> | 1.29 [0.74–2.25]   | 0.3714 |
| Disease duration, years [continuous]                              | 1.01 [0.98–1.05]   | 0.4523 |
| Baseline total Mayo score [continuous]                            | 1.12 [0.96–1.31]   | 0.1478 |
| Baseline total Mayo score, $<9$ vs $\geq 9$                       | 0.63 [0.35–1.14]   | 0.1293 |
| Baseline ALC, cells/mm <sup>3</sup> [continuous]                  | 0.96 [0.69–1.35]   | 0.8317 |
| Baseline ANC, cells/mm <sup>3</sup> [continuous]                  | 0.99 [0.89–1.10]   | 0.8672 |
| Baseline HDL, mg/dL [continuous]                                  | 1.00 [0.99–1.02]   | 0.5413 |
| Baseline HDL $<40$ mg/dL, no vs yes                               | 1.00 [0.43–2.35]   | 0.9983 |
| History of diabetes, no vs yes                                    | 0.76 [0.24–2.45]   | 0.6470 |
| History of MI, no vs yes                                          | 1.04 [0.14–7.53]   | 0.9692 |
| History of NMSC, no vs yes                                        | 458216.4 [0.00–NA] | 0.9839 |
| Prior immunosuppressant use, no vs yes                            | 0.67 [0.32–1.38]   | 0.2769 |
| Prior TNFi exposure, no vs yes                                    | 0.87 [0.49–1.53]   | 0.6176 |
| Prior TNFi failure, no vs yes                                     | 1.19 [0.47–3.00]   | 0.7139 |
| Baseline corticosteroid use, no vs yes                            | 0.77 [0.44–1.36]   | 0.3723 |
| Prior corticosteroid use, no vs yes                               | 1.38 [0.77–2.47]   | 0.2856 |
| Corticosteroid dose, mg/day [range] <sup>b</sup>                  |                    | 0.3897 |
| $<15$ vs $\geq 15$                                                | 0.90 [0.30–2.70]   |        |
| $<15$ vs other                                                    | 0.61 [0.24–1.55]   |        |
| $\geq 15$ vs other                                                | 0.68 [0.32–1.40]   |        |
| Tofacitinib dose, PD tofacitinib 10 vs 5 mg BID                   | 1.40 [0.70–2.82]   | 0.3408 |

115 In total, 1157 patients in the Overall plus P3b/4 [2020] Cohort were included in Cox univariate models; each  
116 covariate was assessed in a separate model; covariates which significantly changed the risk of a serious infection  
117 are shown in **bold** text.

118 <sup>a</sup>Median disease duration = 6.3 years.

119 <sup>b</sup>Prednisone equivalent.

120 ALC, absolute lymphocyte count; ANC, absolute neutrophil count; BID, twice daily; BMI, body mass index;

121 CI, confidence interval; HDL, high-density lipoprotein; HR, hazard ratio; MI, myocardial infarction; NA, not

122 available; NMSC, non-melanoma skin cancer; PD, predominant dose; TNFi, tumor necrosis factor inhibitor.



123 **Supplementary Table 3.** Univariate regression analysis of risk factors for opportunistic  
 124 infections in the Overall plus P3b/4 [2020] Cohort

| <b>Covariate</b>                    | <b>HR [95% CI]</b> | <b><i>p</i> value</b> |
|-------------------------------------|--------------------|-----------------------|
| Age, years [10-year increments]     | 1.18 [0.92–1.52]   | 0.1916                |
| Age, years [continuous]             | 1.02 [0.99–1.04]   | 0.1916                |
| Age <65 vs ≥65 years                | 0.69 [0.21–2.29]   | 0.5493                |
| Age, years [range]                  |                    | 0.4992                |
| ≥30–<40 vs ≥40–<50                  | 0.60 [0.19–1.89]   |                       |
| ≥30–<40 vs <30                      | 0.77 [0.22–2.65]   |                       |
| ≥30–<40 vs ≥50                      | 0.47 [0.17–1.32]   |                       |
| ≥40–<50 vs <30                      | 1.28 [0.41–4.03]   |                       |
| ≥40–<50 vs ≥50                      | 0.78 [0.31–1.96]   |                       |
| <30 vs ≥50                          | 0.61 [0.22–1.72]   |                       |
| Sex, female vs male                 | 1.25 [0.61–2.55]   | 0.5489                |
| <b>Body weight, kg [continuous]</b> | 0.98 [0.95–1.00]   | <b>0.0458</b>         |
| Body weight, kg [<90 vs ≥90]        | 1.22 [0.42–3.48]   | 0.7166                |
| BMI, kg/m <sup>2</sup> [continuous] | 0.93 [0.86–1.02]   | 0.1187                |
| BMI, kg/m <sup>2</sup> [range]      |                    | 0.2778                |
| ≥25–<30 vs <25                      | 1.18 [0.55–2.55]   |                       |
| ≥25–<30 vs ≥30                      | 5.36 [0.69–41.85]  |                       |
| <25 vs ≥30                          | 4.52 [0.61–33.79]  |                       |
| Geographic region                   |                    | 0.1718                |
| North America/Europe/other          |                    |                       |
| North America vs Europe             | 2.16 [0.96–4.87]   |                       |
| North America vs other              | 1.74 [0.63–4.80]   |                       |
| Europe vs other                     | 0.81 [0.31–2.10]   |                       |
| Asia vs Rest of the World           | 1.92 [0.78–4.69]   | 0.1549                |
| Race                                |                    |                       |
| Asian vs non-Asian                  | 1.99 [0.85–4.65]   | 0.1106                |
| White vs non-White                  | 0.52 [0.24–1.11]   | 0.0908                |
| Race [comparison]                   |                    | 0.3357                |
| Asian vs Black                      | 312754.5 [0.00–NA] |                       |
| Asian vs White                      | 2.09 [0.88–4.95]   |                       |
| Asian vs other                      | 1.00 [0.21–4.80]   |                       |
| Black vs White                      | 0.00 [0.00–NA]     |                       |
| Black vs other                      | 0.00 [0.00–NA]     |                       |
| Other vs White                      | 2.10 [0.49–8.99]   |                       |

|                                                           |                    |               |
|-----------------------------------------------------------|--------------------|---------------|
| Smoking status                                            |                    | 0.5195        |
| Ex-smoker vs never smoked                                 | 1.52 [0.74–3.14]   |               |
| Ex-smoker vs smoker                                       | 1719150 [0.00–NA]  |               |
| Never smoked vs smoker                                    | 1127610 [0.00–NA]  |               |
| Disease duration, years [<6.3 vs ≥6.3 years] <sup>a</sup> | 0.82 [0.40–1.68]   | 0.5818        |
| Disease duration, years [continuous]                      | 1.01 [0.96–1.06]   | 0.6936        |
| Baseline total Mayo score [continuous]                    | 1.19 [0.96–1.47]   | 0.1216        |
| Baseline total Mayo score, <9 vs ≥9                       | 0.67 [0.31–1.42]   | 0.2953        |
| Baseline ALC, cells/mm <sup>3</sup> [continuous]          | 0.88 [0.56–1.39]   | 0.5948        |
| <b>Baseline ANC, cells/mm<sup>3</sup> [continuous]</b>    | 0.80 [0.66–0.97]   | <b>0.0229</b> |
| Baseline HDL, mg/dL [continuous]                          | 1.01 [0.99–1.03]   | 0.5277        |
| Baseline HDL <40 mg/dL, no vs yes                         | 4053059 [0.00–NA]  | 0.9879        |
| <b>History of diabetes, no vs yes</b>                     | 0.30 [0.11–0.86]   | <b>0.0256</b> |
| History of MI, no vs yes                                  | 0.59 [0.08–4.30]   | 0.5987        |
| History of NMSC, no vs yes                                | 458518.3 [0.00–NA] | 0.9874        |
| Prior immunosuppressant use, no vs yes                    | 1.05 [0.47–2.36]   | 0.9067        |
| <b>Prior TNFi exposure, no vs yes</b>                     | 0.44 [0.20–0.96]   | <b>0.0401</b> |
| <b>Prior TNFi failure, no vs yes</b>                      | 0.39 [0.18–0.86]   | <b>0.0192</b> |
| Baseline corticosteroid use, no vs yes                    | 1.24 [0.59–2.60]   | 0.5754        |
| Prior corticosteroid use, no vs yes                       | 2.02 [0.77–5.28]   | 0.1520        |
| Corticosteroid dose, mg/day [range] <sup>b</sup>          |                    | 0.3427        |
| <15 vs ≥15                                                | 2.55 [0.72–9.04]   |               |
| <15 vs other                                              | 1.34 [0.54–3.34]   |               |
| ≥15 vs other                                              | 0.53 [0.18–1.54]   |               |
| Tofacitinib dose, PD tofacitinib 10 vs 5 mg BID           | 0.89 [0.40–2.01]   | 0.7839        |

125 In total, 1124 patients in the Overall plus P3b/4 [2020] Cohort were included in Cox univariate models; each  
126 covariate was assessed in a separate model; covariates which significantly changed the risk of an opportunistic  
127 infection are shown in **bold** text.

128 <sup>a</sup>Median disease duration = 6.3 years.

129 <sup>b</sup>Prednisone equivalent.

130 ALC, absolute lymphocyte count; ANC, absolute neutrophil count; BID, twice daily; BMI, body mass index;

131 CI, confidence interval; HDL, high-density lipoprotein; HR, hazard ratio; MI, myocardial infarction; NA, not

132 available; NMSC, non-melanoma skin cancer; PD, predominant dose; TNFi, tumor necrosis factor inhibitor.

133 **Supplementary Table 4.** Proportions and IRs for adjudicated malignancy events in the  
 134 Overall plus P3b/4 [2020] Cohort

| <i>n</i> [%], IR [95% CI]              | PD tofacitinib<br>5 mg BID<br>[ <i>N</i> = 202] | PD tofacitinib<br>10 mg BID<br>[ <i>N</i> = 955] | Tofacitinib All<br>[ <i>N</i> = 1124] <sup>a</sup> |
|----------------------------------------|-------------------------------------------------|--------------------------------------------------|----------------------------------------------------|
| All malignancies                       | 9 [4.5]<br>1.13 [0.52–2.15]                     | 37 [4.0]<br>1.66 [1.17–2.28]                     | 46 [4.1]<br>1.52 [1.11–2.03]                       |
| Malignancies [excl. NMSC] <sup>b</sup> | 5 [2.5]<br>0.62 [0.20–1.45]                     | 21 [2.3]<br>0.92 [0.57–1.41]                     | 26 [2.3]<br>0.84 [0.55–1.24]                       |
| Colorectal Cancer                      | 0 [0.0]<br>0.00 [0.00–0.46]                     | 4 [0.4]<br>0.17 [0.05–0.45]                      | 4 [0.4]<br>0.13 [0.04–0.33]                        |
| Lung Cancer                            | 0 [0.0]<br>0.00 [0.00–0.46]                     | 2 [0.2]<br>0.09 [0.01–0.32]                      | 2 [0.2]<br>0.06 [0.01–0.23]                        |
| Breast Cancer <sup>c</sup>             | 2 [2.3]<br>0.61 [0.07–2.21]                     | 1 [0.3]<br>0.11 [0.00–0.59]                      | 3 [0.6]<br>0.24 [0.05–0.69]                        |
| Lymphoma and LPD                       | 1 [0.5]<br>0.12 [0.00–0.69]                     | 1 [0.1]<br>0.04 [0.00–0.24]                      | 2 [0.2]<br>0.06 [0.01–0.23]                        |
| Melanoma                               | 0 [0.0]<br>0.00 [0.00–0.46]                     | 2 [0.2]<br>0.09 [0.01–0.32]                      | 2 [0.2]<br>0.06 [0.01–0.23]                        |
| Pancreatic Cancer                      | 0 [0.0]<br>0.00 [0.00–0.46]                     | 0 [0.0]<br>0.00 [0.00–0.16]                      | 0 [0.0]<br>0.00 [0.00–0.12]                        |
| Prostate Cancer <sup>d</sup>           | 0 [0.0]<br>0.00 [0.00–0.77]                     | 0 [0.0]<br>0.00 [0.00–0.27]                      | 0 [0.0]<br>0.00 [0.00–0.20]                        |
| NMSC                                   | 5 [2.5]<br>0.63 [0.20–1.47]                     | 17 [1.8]<br>0.76 [0.44–1.22]                     | 22 [2.0]<br>0.73 [0.45–1.10]                       |
| Basal cell carcinoma <sup>c</sup>      | 4 [2.0]<br>0.50 [0.14–1.29]                     | 12 [1.3]<br>0.53 [0.28–0.93]                     | 16 [1.4]<br>0.52 [0.30–0.85]                       |
| Squamous cell carcinoma <sup>c</sup>   | 2 [1.0]<br>0.25 [0.03–0.90]                     | 9 [1.0]<br>0.40 [0.18–0.76]                      | 11 [1.0]<br>0.36 [0.18–0.64]                       |

135 <sup>a</sup>Adjudicated events [excludes phase 2 study data].

136 <sup>b</sup>Malignancies [excluding NMSC] reported in the Overall plus P3b/4 [2020] Cohort included one case of each of  
 137 acute myeloid leukemia, Bowen’s disease, diffuse large B-cell lymphoma, Epstein-Barr virus associated  
 138 lymphoma, essential thrombocythemia, hepatic angiosarcoma, leiomyosarcoma, esophageal adenocarcinoma,  
 139 renal cell carcinoma, penile dysplasia, and vulvar cancer; two cases of cervical dysplasia, cholangiocarcinoma,  
 140 lung cancer, and malignant melanoma; three cases of breast cancer; and four cases of colorectal cancer.

141 <sup>c</sup>*N* = 86, *N* = 380, and *N* = 466 for PD tofacitinib 5 mg BID, PD tofacitinib 10 mg BID, and tofacitinib all  
 142 groups, respectively

143 <sup>d</sup>*N* = 116, *N* = 542, and *N* = 658 for PD tofacitinib 5 mg BID, PD tofacitinib 10 mg BID, and tofacitinib all

144 groups, respectively

145 °There were five patients who experienced both basal cell carcinoma and squamous cell carcinoma.

146 BID, twice daily; CI, confidence interval; IR, incidence rate [unique patients with events/100 PY of exposure];

147 LPD, lymphoproliferative disease;  $N$ , number of patients treated in the treatment group;  $n$ , number of unique

148 patients with a particular malignancy; NMSC, non-melanoma skin cancer; PD, predominant dose;

149 PY, patient-years.

150 **Supplementary Table 5.** Univariate regression analysis of risk factors for malignancy

151 [excluding NMSC] in the Overall plus P3b/4 [2020] Cohort

| <b>Covariate</b>                          | <b>HR [95% CI]</b> | <b><i>p</i> value</b> |
|-------------------------------------------|--------------------|-----------------------|
| <b>Age, years [10-year increments]</b>    | 1.54 [1.17–2.03]   | <b>0.0023</b>         |
| <b>Age, years [continuous]</b>            | 1.04 [1.02–1.07]   | <b>0.0023</b>         |
| <b>Age &lt;65 vs ≥65 years</b>            | 0.22 [0.09–0.53]   | <b>0.0007</b>         |
| Age, years [range]                        |                    | 0.0975                |
| ≥30–<40 vs ≥40–<50                        | 1.11 [0.30–4.13]   |                       |
| ≥30–<40 vs <30                            | 1.80 [0.35–9.27]   |                       |
| ≥30–<40 vs ≥50                            | 0.44 [0.16–1.22]   |                       |
| ≥40–<50 vs <30                            | 1.62 [0.30–8.88]   |                       |
| ≥40–<50 vs ≥50                            | 0.40 [0.13–1.21]   |                       |
| <30 vs ≥50                                | 0.25 [0.06–1.08]   |                       |
| Sex, female vs male                       | 0.77 [0.34–1.74]   | 0.5348                |
| Body weight, kg [continuous]              | 1.02 [0.99–1.04]   | 0.1539                |
| Body weight, kg [<90 vs ≥90]              | 0.84 [0.32–2.23]   | 0.7260                |
| <b>BMI, kg/m<sup>2</sup> [continuous]</b> | 1.06 [1.00–1.13]   | <b>0.0385</b>         |
| BMI, kg/m <sup>2</sup> [range]            |                    | 0.0544                |
| ≥25–<30 vs <25                            | 1.81 [0.72–4.60]   |                       |
| ≥25–<30 vs ≥30                            | 0.58 [0.22–1.54]   |                       |
| <25 vs ≥30                                | 0.32 [0.13–0.81]   |                       |
| <b>Geographic region</b>                  |                    | <b>0.0060</b>         |
| North America/Europe/other                |                    |                       |
| North America vs Europe                   | 4.01 [1.68–9.54]   |                       |
| North America vs other                    | 2.51 [0.88–7.16]   |                       |
| Europe vs Other                           | 0.63 [0.21–1.87]   |                       |
| Asia vs Rest of the World                 | 0.30 [0.04–2.20]   | 0.2348                |
| Race                                      |                    |                       |
| Asian vs non-Asian                        | 0.26 [0.03–1.90]   | 0.1834                |
| White vs non-White                        | 1.99 [0.60–6.64]   | 0.2625                |
| Race [comparison]                         |                    | 0.6200                |
| Asian vs Black                            | 49472.83 [0.00–NA] |                       |
| Asian vs White                            | 0.26 [0.03–1.90]   |                       |
| Asian vs other                            | 0.29 [0.02–4.64]   |                       |
| Black vs White                            | 0.00 [0.00–NA]     |                       |
| Black vs other                            | 0.00 [0.00–NA]     |                       |
| Other vs White                            | 0.88 [0.12–6.56]   |                       |
| Smoking status                            |                    | 0.2723                |
| Ex-smoker vs never smoked                 | 1.89 [0.87–4.07]   |                       |

|                                                                    |                   |               |
|--------------------------------------------------------------------|-------------------|---------------|
| Ex-smoker vs smoker                                                | 1955749 [0.00–NA] |               |
| Never smoked vs smoker                                             | 1037391 [0.00–NA] |               |
| <b>Disease duration, years [&lt;6.3 vs ≥6.3 years]<sup>a</sup></b> | 0.27 [0.10–0.72]  | <b>0.0085</b> |
| <b>Disease duration, years [continuous]</b>                        | 1.07 [1.03–1.11]  | <b>0.0002</b> |
| Baseline total Mayo score [continuous]                             | 1.07 [0.87–1.31]  | 0.5313        |
| Baseline total Mayo score, <9 vs ≥9                                | 0.82 [0.37–1.81]  | 0.6212        |
| Baseline ALC, cells/mm <sup>3</sup> [continuous]                   | 0.58 [0.32–1.04]  | 0.0679        |
| Baseline ANC, cells/mm <sup>3</sup> [continuous]                   | 1.04 [0.91–1.18]  | 0.5525        |
| History of diabetes, yes vs no                                     | 0.39 [0.12–1.30]  | 0.1259        |
| <b>History of NMSC, no vs yes</b>                                  | 0.17 [0.05–0.57]  | <b>0.0039</b> |
| Prior immunosuppressant use, no vs yes                             | 0.38 [0.11–1.26]  | 0.1145        |
| Prior TNFi exposure, no vs yes                                     | 0.54 [0.24–1.21]  | 0.1341        |
| Prior TNFi failure, no vs yes                                      | 0.48 [0.21–1.07]  | 0.0715        |
| Baseline corticosteroid use, no vs yes                             | 0.95 [0.43–2.06]  | 0.8907        |
| Prior corticosteroid use, no vs yes                                | 1.34 [0.40–4.47]  | 0.6343        |
| Corticosteroid dose, mg/day [range] <sup>b</sup>                   |                   | 0.6058        |
| <15 vs ≥15                                                         | 1.95 [0.52–7.29]  |               |
| <15 vs other                                                       | 1.28 [0.47–3.49]  |               |
| ≥15 vs other                                                       | 0.66 [0.22–1.96]  |               |
| Tofacitinib dose, PD tofacitinib 10 vs 5 mg BID                    | 1.51 [0.57–4.01]  | 0.4097        |

152 In total, 1124 patients in the Overall plus P3b/4 [2020] Cohort were included in Cox univariate models; each  
153 covariate was assessed in a separate model; covariates which significantly changed the risk of malignancies  
154 [excluding NMSC] are shown in **bold** text.

155 <sup>a</sup>Median disease duration = 6.3 years.

156 <sup>b</sup>Prednisone equivalent.

157 ALC, absolute lymphocyte count; ANC, absolute neutrophil count; BID, twice daily; BMI, body mass index;

158 CI, confidence interval; HR, hazard ratio; NA, not available; NMSC, non-melanoma skin cancer;

159 PD, predominant dose; TNFi, tumor necrosis factor inhibitor.

160 **Supplementary Table 6.** Univariate regression analysis of risk factors for NMSC in the

161 Overall plus P3b/4 [2020] Cohort

| <b>Covariate</b>                       | <b>HR [95% CI]</b> | <b><i>p</i> value</b> |
|----------------------------------------|--------------------|-----------------------|
| <b>Age, years [10-year increments]</b> | 2.67 [1.88–3.80]   | <b>&lt;0.0001</b>     |
| <b>Age, years [continuous]</b>         | 1.10 [1.07–1.14]   | <b>&lt;0.0001</b>     |
| <b>Age &lt;65 vs ≥65 years</b>         | 0.11 [0.05–0.25]   | <b>&lt;0.0001</b>     |
| Age, years [range]                     |                    | 0.2302                |
| ≥30–<40 vs ≥40–<50                     | 0.00 [0.00–NA]     |                       |
| ≥30–<40 vs <30                         | 1.01 [0.00–NA]     |                       |
| ≥30–<40 vs ≥50                         | 0.00 [0.00–NA]     |                       |
| ≥40–<50 vs <30                         | 14841738 [0.00–NA] |                       |
| ≥40–<50 vs ≥50                         | 0.32 [0.11–0.94]   |                       |
| <30 vs ≥50                             | 0.00 [0.00–NA]     |                       |
| Sex, female vs male                    | 0.42 [0.15–1.13]   | 0.0867                |
| Body weight, kg [continuous]           | 1.02 [1.00–1.04]   | 0.0866                |
| Body weight, kg [<90 vs ≥90]           | 0.52 [0.20–1.32]   | 0.1687                |
| BMI, kg/m <sup>2</sup> [continuous]    | 1.03 [0.95–1.11]   | 0.4848                |
| BMI, kg/m <sup>2</sup> [range]         |                    | 0.7140                |
| ≥25–<30 vs <25                         | 1.42 [0.55–3.67]   |                       |
| ≥25–<30 vs ≥30                         | 1.00 [0.29–3.43]   |                       |
| <25 vs ≥30                             | 0.70 [0.22–2.23]   |                       |
| <b>Geographic region</b>               |                    | <b>0.0008</b>         |
| North America/Europe/other             |                    |                       |
| North America vs Europe                | 5.35 [2.10–13.65]  |                       |
| North America vs other                 | 4.39 [1.23–15.63]  |                       |
| Europe vs Other                        | 0.82 [0.21–3.17]   |                       |
| Asia vs Rest of the World              | 0.00 [0.00–NA]     | 0.9895                |
| Race                                   |                    |                       |
| Asian vs non-Asian                     | 0.00 [0.00–NA]     | 0.9889                |
| White vs non-White                     | 2.65 [0.62–11.35]  | 0.1902                |
| Race [comparison]                      |                    | 1.0000                |
| Asian vs Black                         | 1.00 [0.00–NA]     |                       |
| Asian vs White                         | 0.00 [0.00–NA]     |                       |
| Asian vs other                         | 0.00 [0.00–NA]     |                       |
| Black vs White                         | 0.00 [0.00–NA]     |                       |
| Black vs other                         | 0.00 [0.00–NA]     |                       |
| Other vs White                         | 1.04 [0.14–7.77]   |                       |
| <b>Smoking status</b>                  |                    | <b>0.0130</b>         |
| Ex-smoker vs never smoked              | 3.92 [1.58–9.73]   |                       |

|                                                                    |                   |                   |
|--------------------------------------------------------------------|-------------------|-------------------|
| Ex-smoker vs smoker                                                | 1.70 [0.22–12.93] |                   |
| Never smoked vs smoker                                             | 0.43 [0.05–3.52]  |                   |
| Disease duration, years [ $<6.3$ vs $\geq 6.3$ years] <sup>a</sup> | 0.66 [0.27–1.57]  | 0.3421            |
| <b>Disease duration, years [continuous]</b>                        | 1.05 [1.01–1.10]  | <b>0.0136</b>     |
| Baseline total Mayo score [continuous]                             | 1.12 [0.89–1.42]  | 0.3227            |
| Baseline total Mayo score, $<9$ vs $\geq 9$                        | 0.90 [0.39–2.11]  | 0.8131            |
| Baseline ALC, cells/mm <sup>3</sup> [continuous]                   | 0.68 [0.38–1.23]  | 0.2036            |
| Baseline ANC, cells/mm <sup>3</sup> [continuous]                   | 0.94 [0.79–1.13]  | 0.5345            |
| Baseline HDL, mg/dL [continuous]                                   | 1.01 [0.99–1.03]  | 0.2124            |
| Baseline HDL $<40$ mg/dL, no vs yes                                | 0.89 [0.26–3.00]  | 0.8458            |
| History of diabetes, no vs yes                                     | 1.18 [0.16–8.93]  | 0.8736            |
| History of MI, no vs yes                                           | 0.24 [0.05–1.03]  | 0.0543            |
| <b>History of NMSC, no vs yes</b>                                  | 0.02 [0.01–0.06]  | <b>&lt;0.0001</b> |
| Prior immunosuppressant use, no vs yes                             | 0.29 [0.07–1.23]  | 0.0924            |
| <b>Prior TNFi exposure, no vs yes</b>                              | 0.30 [0.11–0.81]  | <b>0.0177</b>     |
| <b>Prior TNFi failure, no vs yes</b>                               | 0.34 [0.13–0.86]  | <b>0.0231</b>     |
| Baseline corticosteroid use, no vs yes                             | 1.06 [0.45–2.49]  | 0.8940            |
| <b>Prior corticosteroid use, no vs yes</b>                         | 3.14 [1.15–8.54]  | <b>0.0249</b>     |
| Corticosteroid dose, mg/day [range] <sup>b</sup>                   |                   | 0.5265            |
| $<15$ vs $\geq 15$                                                 | 0.43 [0.09–2.08]  |                   |
| $<15$ vs other                                                     | 0.61 [0.14–2.75]  |                   |
| $\geq 15$ vs other                                                 | 1.44 [0.57–3.62]  |                   |
| Tofacitinib dose, PD tofacitinib 10 vs 5 mg BID                    | 1.18 [0.44–3.22]  | 0.7401            |

162 In total, 1124 patients in the Overall plus P3b/4 [2020] Cohort were included in Cox univariate models; each  
163 covariate was assessed in a separate model; covariates which significantly changed the risk of NMSC are shown  
164 in **bold** text.

165 <sup>a</sup>Median disease duration = 6.3 years.

166 <sup>b</sup>Prednisone equivalent.

167 ALC, absolute lymphocyte count; ANC, absolute neutrophil count; BID, twice daily; BMI, body mass index;

168 CI, confidence interval; HDL, high-density lipoprotein; HR, hazard ratio; MI, myocardial infarction; NA, not

169 available; NMSC, non-melanoma skin cancer; PD, predominant dose; TNFi, tumor necrosis factor inhibitor.



170 **Supplementary Table 7.** Proportions and IRs for adjudicated MACE in the Overall plus

171 P3b/4 [2020] Cohort

| <i>n</i> [%], IR [95% CI] | <b>PD tofacitinib<br/>5 mg BID<br/>[<i>N</i> = 202]</b> | <b>PD tofacitinib<br/>10 mg BID<br/>[<i>N</i> = 922]</b> | <b>Tofacitinib All<br/>[<i>N</i> = 1124]<sup>a</sup></b> |
|---------------------------|---------------------------------------------------------|----------------------------------------------------------|----------------------------------------------------------|
| MACE                      | 4 [2.0]<br>0.50 [0.14–1.29]                             | 5 [0.5]<br>0.22 [0.07–0.51]                              | 9 [0.8]<br>0.29 [0.13–0.55]                              |
| Fatal MACE                | 0 [0.0]<br>0.00 [0.00–0.46]                             | 2 [0.2]<br>0.09 [0.01–0.32]                              | 2 [0.2]<br>0.06 [0.01–0.23]                              |
| Non-fatal MACE            | 4 [2.0]<br>0.50 [0.14–1.29]                             | 3 [0.3]<br>0.13 [0.03–0.38]                              | 7 [0.6]<br>0.23 [0.09–0.47]                              |
| MI                        | 3 [1.5]<br>0.38 [0.08–1.10]                             | 0 [0.0]<br>0.00 [0.00–0.16]                              | 3 [0.3]<br>0.10 [0.02–0.28]                              |
| Cerebrovascular accident  | 1 [0.5]<br>0.12 [0.00–0.69]                             | 3 [0.3]<br>0.13 [0.03–0.38]                              | 4 [0.4]<br>0.13 [0.04–0.33]                              |

172 MACE were adjudicated by an independent review committee and defined as any MI, stroke, or CV death.

173 <sup>a</sup>Adjudicated events [excludes phase 2 study data].

174 BID, twice daily; CI, confidence interval; CV, cardiovascular; IR, incidence rate [unique patients with

175 events/100 PY of exposure]; MACE, major adverse cardiovascular events; MI, myocardial infarction;

176 *N*, number of patients treated in the treatment group; *n*, number of unique patients with a particular AE;

177 PD, predominant dose.

178 **Supplementary Table 8.** Listing of adjudicated MACE

|                                                          | <b>Acute coronary syndrome</b>  | <b>Acute MI</b>                | <b>Cerebellar hemorrhage</b>               | <b>MI</b>                         | <b>Cerebrovascular accident</b> | <b>Hemorrhagic stroke</b>                             | <b>Aortic dissection</b> | <b>Cardiac arrest</b> | <b>Cerebrovascular accident</b> |
|----------------------------------------------------------|---------------------------------|--------------------------------|--------------------------------------------|-----------------------------------|---------------------------------|-------------------------------------------------------|--------------------------|-----------------------|---------------------------------|
| Tofacitinib dose at onset                                | 5 mg BID                        | 5 mg BID                       | 5 mg BID                                   | 5 mg BID                          | 5 mg BID                        | 10 mg BID                                             | 10 mg BID                | 10 mg BID             | 10 mg BID                       |
| Sex                                                      | Male                            | Male                           | Male                                       | Male                              | Female                          | Female                                                | Male                     | Male                  | Male                            |
| Age [years] <sup>a</sup>                                 | 66                              | 64                             | 55                                         | 74                                | 62                              | 55                                                    | 39                       | 67                    | 56                              |
| Day of onset <sup>b</sup>                                | 28                              | 1540                           | 1438                                       | 142                               | 1681                            | 148                                                   | 31                       | 1725                  | 951                             |
| Baseline CV risk factors                                 |                                 |                                |                                            |                                   |                                 |                                                       |                          |                       |                                 |
| Smoking status                                           | Ex-smoker                       | Non-smoker                     | Non-smoker                                 | Ex-smoker                         | Non-smoker                      | Non-smoker                                            | Non-smoker               | Ex-smoker             | Smoker                          |
| BMI [kg/m <sup>2</sup> ]                                 | ≥25–<30                         | <25                            | <25                                        | <25                               | <25                             | ≥25–<30                                               | <25                      | ≥30                   | ≥30                             |
| Medical history                                          | Angina pectoris; arrhythmia; MI | No significant medical history | Left ventricular hypertrophy; hypertension | Hyperlipidemia; hypertension; DVT | Arterial hypertension           | Hypertension; hypercholesterolemia; diabetes mellitus | Hyperlipidemia           | PE; dyslipidemia      | Diabetes mellitus; hypertension |
| Concomitant medications                                  |                                 |                                |                                            |                                   |                                 |                                                       |                          |                       |                                 |
| Lipid-lowering                                           | Yes                             | Yes                            | Yes                                        | Yes                               | No                              | Yes                                                   | No                       | Yes                   | Yes                             |
| Anti-diabetic                                            | Yes                             | No                             | No                                         | No                                | No                              | Yes                                                   | No                       | No                    | Yes                             |
| Anti-hypertension                                        | Yes                             | Yes                            | Yes                                        | No                                | Yes                             | Yes                                                   | No                       | No                    | Yes                             |
| Baseline serum lipid concentrations [mg/dL] <sup>c</sup> |                                 |                                |                                            |                                   |                                 |                                                       |                          |                       |                                 |
| TC                                                       | 192                             | 220                            | 258                                        | 161                               | 209                             | 183                                                   | 308                      | 130                   | 242                             |
| HDL-c                                                    | 112                             | 79                             | 47                                         | 63                                | 56                              | 63                                                    | 80                       | 43                    | 39                              |
| LDL-c                                                    | 59                              | 118                            | 162                                        | 71                                | 131                             | 94                                                    | 189                      | 70                    | 128                             |
| Triglycerides                                            | 105                             | 116                            | 246                                        | 134                               | 109                             | 132                                                   | 194                      | 84                    | 373                             |

| Outcome | Temporary discontinuation | Temporary discontinuation | Permanent discontinuation | Temporary discontinuation | Permanent discontinuation | Permanent discontinuation | Death | Death | Permanent discontinuation |
|---------|---------------------------|---------------------------|---------------------------|---------------------------|---------------------------|---------------------------|-------|-------|---------------------------|
|---------|---------------------------|---------------------------|---------------------------|---------------------------|---------------------------|---------------------------|-------|-------|---------------------------|

179 MACE were adjudicated by an independent review committee and defined as any MI, stroke, or CV death.

180 <sup>a</sup>Age at induction baseline

181 <sup>b</sup>Day of onset was computed as difference between onset date of event and date of first dose of study drug +1.

182 <sup>c</sup>Reference ranges: TC, 130–200 mg/dL; HDL-c, 40–80 mg/dL; LDL-c, 0–130 mg/dL; triglycerides, 45–250 mg/dL.

183 BID, twice daily; BMI, body mass index; CV, cardiovascular; DVT, deep vein thrombosis; HDL-c, high-density lipoprotein-cholesterol; LDL-c, low-density

184 lipoprotein-cholesterol; MACE, major adverse cardiovascular events; MI, myocardial infarction; PE, pulmonary embolism; TC, total cholesterol.

185 **Supplementary Table 9.** Univariate regression analysis of risk factors for MACE in the

186 Overall plus P3b/4 [2020] Cohort

| Covariate                           | HR [95% CI]       | <i>p</i> value |
|-------------------------------------|-------------------|----------------|
| Age, years [10-year increments]     | 2.54 [1.48–4.38]  | <b>0.0008</b>  |
| Age, years [continuous]             | 1.10 [1.04–1.16]  | <b>0.0008</b>  |
| Age <65 vs ≥65 years                | 0.15 [0.04–0.59]  | <b>0.0069</b>  |
| Age, years [range]                  |                   | 0.3716         |
| ≥30–<40 vs ≥40–<50                  | 3250141 [0.00–NA] |                |
| ≥30–<40 vs <30                      | 3299729 [0.00–NA] |                |
| ≥30–<40 vs ≥50                      | 0.15 [0.02–1.22]  |                |
| ≥40–<50 vs <30                      | 1.02 [0.00–NA]    |                |
| ≥40–<50 vs ≥50                      | 0.00 [0.00–NA]    |                |
| <30 vs ≥50                          | 0.00 [0.00–NA]    |                |
| Sex, female vs male                 | 0.42 [0.09–2.04]  | 0.2828         |
| Body weight, kg [continuous]        | 1.00 [0.97–1.04]  | 0.8559         |
| Body weight, kg [<90 vs ≥90]        | 0.67 [0.14–3.21]  | 0.6124         |
| BMI, kg/m <sup>2</sup> [continuous] | 1.02 [0.90–1.15]  | 0.7534         |
| BMI, kg/m <sup>2</sup> [range]      |                   | 0.8806         |
| ≥25–<30 vs <25                      | 1.37 [0.33–5.71]  |                |
| ≥25–<30 vs ≥30                      | 1.62 [0.17–15.55] |                |
| <25 vs ≥30                          | 1.18 [0.14–10.14] |                |
| Geographic region                   |                   | 0.7929         |
| North America/Europe/other          |                   |                |
| North America vs Europe             | 1.00 [0.20–4.98]  |                |
| North America vs other              | 2.07 [0.19–22.80] |                |
| Europe vs other                     | 2.06 [0.25–17.09] |                |
| Asia vs Rest of the World           | 0.95 [0.12–7.59]  | 0.9604         |
| Race                                |                   |                |
| Asian vs non-Asian                  | 0.82 [0.10–6.55]  | 0.8505         |
| White vs non-White                  | 2.05 [0.26–16.39] | 0.4988         |
| Race [comparison]                   |                   | 0.9949         |
| Asian vs Black                      | 1013483 [0.00–NA] |                |
| Asian vs White                      | 0.75 [0.09–6.01]  |                |
| Asian vs other                      | 1013955 [0.00–NA] |                |
| Black vs White                      | 0.00 [0.00–NA]    |                |
| Black vs other                      | 1.00 [0.00–NA]    |                |
| Other vs White                      | 0.00 [0.00–NA]    |                |
| Smoking status                      |                   | 0.5702         |
| Ex-smoker vs never smoked           | 1.19 [0.28–4.99]  |                |

|                                                                    |                    |               |
|--------------------------------------------------------------------|--------------------|---------------|
| Ex-smoker vs smoker                                                | 0.37 [0.04–3.60]   |               |
| Never smoked vs smoker                                             | 0.31 [0.04–2.69]   |               |
| Disease duration, years [ $<6.3$ vs $\geq 6.3$ years] <sup>a</sup> | 0.88 [0.23–3.26]   | 0.8433        |
| Disease duration, years [continuous]                               | 1.02 [0.94–1.10]   | 0.6834        |
| Baseline total Mayo score [continuous]                             | 0.97 [0.71–1.31]   | 0.8261        |
| Baseline total Mayo score, $<9$ vs $\geq 9$                        | 1.70 [0.46–6.32]   | 0.4314        |
| Baseline ALC, cells/mm <sup>3</sup> [continuous]                   | 0.80 [0.32–2.01]   | 0.6409        |
| Baseline ANC, cells/mm <sup>3</sup> [continuous]                   | 1.14 [0.98–1.32]   | 0.0929        |
| Baseline HDL, mg/dL [continuous]                                   | 1.01 [0.97–1.04]   | 0.6584        |
| Baseline HDL $<40$ mg/dL, no vs yes                                | 0.28 [0.07–1.13]   | 0.0744        |
| <b>History of diabetes, no vs yes</b>                              | 10.96 [2.74–43.88] | <b>0.0007</b> |
| History of MI, no vs yes                                           | 0.14 [0.02–1.11]   | 0.0627        |
| History of NMSC, no vs yes                                         | 458782.7 [0.00–NA] | 0.9930        |
| Prior immunosuppressant use, no vs yes                             | 2.28 [0.61–8.49]   | 0.2198        |
| Prior TNFi exposure, no vs yes                                     | 1.31 [0.35–4.89]   | 0.6863        |
| Prior TNFi failure, no vs yes                                      | 1.87 [0.47–7.48]   | 0.3772        |
| Baseline corticosteroid use, no vs yes                             | 0.37 [0.09–1.47]   | 0.1555        |
| Prior corticosteroid use, no vs yes                                | 1.33 [0.17–10.67]  | 0.7874        |
| Corticosteroid dose, mg/day [range] <sup>b</sup>                   |                    | 0.4008        |
| $<15$ vs $\geq 15$                                                 | 0.44 [0.05–3.96]   |               |
| $<15$ vs other                                                     | 1.12 [0.13–10.01]  |               |
| $\geq 15$ vs other                                                 | 2.53 [0.63–10.13]  |               |
| Tofacitinib dose, PD tofacitinib 10 vs 5 mg BID                    | 0.39 [0.10–1.46]   | 0.1609        |

187 In total, 1124 patients in the Overall plus P3b/4 [2020] Cohort were included in Cox univariate models; each  
188 covariate was assessed in a separate model; covariates which significantly changed the risk of MACE are shown  
189 in **bold** text.

190 <sup>a</sup>Median disease duration = 6.3 years.

191 <sup>b</sup>Prednisone equivalent.

192 ALC, absolute lymphocyte count; ANC, absolute neutrophil count; BID, twice daily; BMI, body mass index;

193 CI, confidence interval; HDL, high-density lipoprotein; HR, hazard ratio; MACE, major adverse cardiovascular

194 events; MI, myocardial infarction; NA, not available; NMSC, non-melanoma skin cancer; PD, predominant

195 dose; TNFi, tumor necrosis factor inhibitor.

196 **Supplementary Table 10.** Changes in lipid-lowering agents in the Overall plus P3b/4 [2020]  
 197 Cohort

| <i>n</i> [%]                                                              | <b>PD tofacitinib<br/>5 mg BID<br/>[<i>N</i> = 202]</b> | <b>PD tofacitinib<br/>10 mg BID<br/>[<i>N</i> = 955]</b> | <b>Tofacitinib All<br/>[<i>N</i> = 1157]</b> |
|---------------------------------------------------------------------------|---------------------------------------------------------|----------------------------------------------------------|----------------------------------------------|
| Patients receiving<br>lipid-lowering agents at<br>baseline                | 17 [8.4]                                                | 57 [6.0]                                                 | 74 [6.4]                                     |
| Patients who began<br>lipid-lowering agents                               | 26 [12.9]                                               | 64 [6.7]                                                 | 90 [7.8]                                     |
| Patients who had an increase in<br>their dose of lipid-lowering<br>agents | 8 [4.0]                                                 | 14 [1.5]                                                 | 22 [1.9]                                     |

198 BID, twice daily; *N*, number of patients treated in the treatment group; *n*, number of unique patients in each  
 199 category; PD, predominant dose.

200 **Supplementary Table 11.** Proportions and IRs for thromboembolic events in the Overall  
 201 plus P3b/4 [2020] Cohort

| <i>n</i> [%], IR [95% CI] | <b>PD tofacitinib<br/>5 mg BID<br/>[<i>N</i> = 202]</b> | <b>PD tofacitinib<br/>10 mg BID<br/>[<i>N</i> = 955]</b> | <b>Tofacitinib All<br/>[<i>N</i> = 1157]</b> |
|---------------------------|---------------------------------------------------------|----------------------------------------------------------|----------------------------------------------|
| VTEs                      | 0 [0.0]<br>0.00 [0.00–0.46]                             | 7 [0.7]<br>0.31 [0.12–0.63]                              | 7 [0.6]<br>0.23 [0.09–0.47]                  |
| DVT                       | 0 [0.0]<br>0.00 [0.00–0.46]                             | 1 [0.1]<br>0.04 [0.00–0.24]                              | 1 [0.1]<br>0.03 [0.00–0.18]                  |
| PE <sup>a</sup>           | 0 [0.0]<br>0.00 [0.00–0.46]                             | 6 [0.6]<br>0.26 [0.10–0.57]                              | 6 [0.5]<br>0.19 [0.07–0.42]                  |
| DVT or PE <sup>a</sup>    | 0 [0.0]<br>0.00 [0.00–0.46]                             | 7 [0.7]<br>0.31 [0.12–0.63]                              | 7 [0.6]<br>0.23 [0.09–0.47]                  |
| DVT and PE <sup>a</sup>   | 0 [0.0]<br>0.00 [0.00–0.46]                             | 0 [0.0]<br>0.00 [0.00–0.16]                              | 0 [0.0]<br>0.00 [0.00–0.12]                  |
| Arterial thromboembolism  | 3 [1.5]<br>0.38 [0.08–1.10]                             | 1 [0.1]<br>0.04 [0.00–0.24]                              | 4 [0.3]<br>0.13 [0.04–0.33]                  |

202 <sup>a</sup>Adjudicated events.

203 AE, adverse event; BID, twice daily; CI, confidence interval; DVT, deep vein thrombosis; IR, incidence rate

204 [unique patients with events/100 PY of exposure]; *N*, number of patients treated in the treatment group;

205 *n*, number of unique patients with a particular AE; PD, predominant dose; PE, pulmonary embolism;

206 PY, patient-years; VTE, venous thromboembolic event.

207 **Supplementary Table 12.** Listing of adjudicated VTEs

|                            | <b>DVT</b>                       | <b>PE</b>  | <b>PE</b>                  | <b>PE</b>                                                        | <b>PE</b>                                       | <b>PE</b>  | <b>PE</b>  |
|----------------------------|----------------------------------|------------|----------------------------|------------------------------------------------------------------|-------------------------------------------------|------------|------------|
| Tofacitinib dose at onset  | 10 mg BID                        | 10 mg BID  | 10 mg BID                  | 10 mg BID                                                        | 10 mg BID                                       | 10 mg BID  | 10 mg BID  |
| Sex                        | Female                           | Male       | Male                       | Female                                                           | Male                                            | Male       | Male       |
| Age [years] at event onset | 58                               | 25         | 57                         | 21                                                               | 70                                              | 59         | 33         |
| Day of onset <sup>a</sup>  | 1149                             | 216        | 236                        | 570                                                              | 384                                             | 1473       | 2564       |
| Baseline CV risk factors   |                                  |            |                            |                                                                  |                                                 |            |            |
| Smoking status             | Non-smoker                       | Non-smoker | Ex-smoker                  | Non-smoker                                                       | Ex-smoker                                       | Non-smoker | Non-smoker |
| BMI [kg/m <sup>2</sup> ]   | <25                              | ≥25–<30    | ≥25–<30                    | >30                                                              | >30                                             | ≥25–<30    | <25        |
| Medical history            | Motorcycle accident <sup>b</sup> | DVT; PE    | Phlebothrombosis<br>Stroke | Receiving oral contraceptives for dysfunctional uterine bleeding | Cholangiocarcinoma metastases to the peritoneum | None       | None       |

208 <sup>a</sup>Day of onset was computed as difference between onset date of event and date of first dose of study drug +1.

209 <sup>b</sup>Patient was diagnosed following a long-haul flight and management of an infected leg wound sustained in a recent motorcycle accident.

210 BID, twice daily; BMI, body mass index; CV, cardiovascular; DVT, deep vein thrombosis; PE, pulmonary embolism; VTE, venous thromboembolic event.



211 **Supplementary Table 13.** Univariate regression analysis of risk factors for VTEs in the

212 Overall plus P3b/4 [2020] Cohort

| <b>Covariate</b>                    | <b>HR [95% CI]</b>  | <b>p value</b> |
|-------------------------------------|---------------------|----------------|
| Age, years [10-year increments]     | 1.03 [0.61–1.76]    | 0.8997         |
| Age, years [continuous]             | 1.00 [0.95–1.06]    | 0.8997         |
| Age <65 vs ≥65 years                | 0.54 [0.06–4.51]    | 0.5657         |
| Age, years [range]                  |                     | 0.7826         |
| ≥30–<40 vs ≥40–<50                  | 2317803 [0.00–NA]   |                |
| ≥30–<40 vs <30                      | 0.33 [0.03–3.68]    |                |
| ≥30–<40 vs ≥50                      | 0.32 [0.04–2.89]    |                |
| ≥40–<50 vs <30                      | 0.00 [0.00–NA]      |                |
| ≥40–<50 vs ≥50                      | 0.00 [0.00–NA]      |                |
| <30 vs ≥50                          | 0.97 [0.18–5.38]    |                |
| Sex, female vs male                 | 0.53 [0.10–2.75]    | 0.4516         |
| Body weight, kg [continuous]        | 1.03 [0.99–1.06]    | 0.1456         |
| Body weight, kg [<90 vs ≥90]        | 0.49 [0.09–2.51]    | 0.3882         |
| BMI, kg/m <sup>2</sup> [continuous] | 1.04 [0.93–1.17]    | 0.4888         |
| BMI, kg/m <sup>2</sup> [range]      |                     | 0.3268         |
| ≥25–<30 vs <25                      | 3.31 [0.55–19.81]   |                |
| ≥25–<30 vs ≥30                      | 0.87 [0.15–5.26]    |                |
| <25 vs ≥30                          | 0.26 [0.04–1.90]    |                |
| Geographic region                   |                     | 0.1356         |
| North America/Europe/other          |                     |                |
| North America vs Europe             | 5.31 [0.94–29.93]   |                |
| North America vs other              | 3.70 [0.40–34.16]   |                |
| Europe vs other                     | 0.70 [0.06–7.70]    |                |
| Asia vs Rest of the World           | 0.00 [0.00–NA]      | 0.9943         |
| Race                                |                     |                |
| Asian vs non-Asian                  | 0.00 [0.00–NA]      | 0.9940         |
| White vs non-White                  | 0.59 [0.11–3.11]    | 0.5292         |
| <b>Race [comparison]</b>            |                     | <b>0.0325</b>  |
| Asian vs Black                      | 0.00 [0.00–NA]      |                |
| Asian vs White                      | 0.00 [0.00–NA]      |                |
| Asian vs other                      | 0.00 [0.00–NA]      |                |
| Black vs White                      | 23.71 [2.64–212.83] |                |
| Black vs other                      | 4.81 [0.30–77.13]   |                |
| Other vs White                      | 4.93 [0.55–44.10]   |                |
| Smoking status                      |                     | 0.9330         |
| Ex-smoker vs never smoked           | 0.73 [0.14–3.79]    |                |

|                                                                    |                    |        |
|--------------------------------------------------------------------|--------------------|--------|
| Ex-smoker vs smoker                                                | 1050462 [0.00–NA]  |        |
| Never smoked vs smoker                                             | 1435927 [0.00–NA]  |        |
| Disease duration, years [ $<6.3$ vs $\geq 6.3$ years] <sup>a</sup> | 0.47 [0.09–2.43]   | 0.3683 |
| Disease duration, years [continuous]                               | 1.04 [0.96–1.12]   | 0.3261 |
| Baseline total Mayo score [continuous]                             | 1.60 [0.93–2.77]   | 0.0919 |
| Baseline total Mayo score, $<9$ vs $\geq 9$                        | 0.20 [0.02–1.71]   | 0.1426 |
| Baseline ALC, cells/mm <sup>3</sup> [continuous]                   | 0.31 [0.08–1.24]   | 0.0990 |
| Baseline ANC, cells/mm <sup>3</sup> [continuous]                   | 0.97 [0.71–1.33]   | 0.8511 |
| Baseline HDL, mg/dL [continuous]                                   | 0.99 [0.94–1.04]   | 0.6139 |
| Baseline HDL $<40$ mg/dL, no vs yes                                | 4019474 [0.00–NA]  | 0.9942 |
| History of diabetes, no vs yes                                     | 1442778 [0.00–NA]  | 0.9931 |
| History of MI, no vs yes                                           | 463112.2 [0.00–NA] | 0.9935 |
| History of NMSC, no vs yes                                         | 458226.5 [0.00–NA] | 0.9944 |
| Prior immunosuppressant use, no vs yes                             | 2.30 [0.51–10.30]  | 0.2771 |
| Prior TNFi exposure, no vs yes                                     | 1.46 [0.32–6.61]   | 0.6214 |
| Prior TNFi failure, no vs yes                                      | 1.25 [0.28–5.59]   | 0.7736 |
| Baseline corticosteroid use, no vs yes                             | 0.98 [0.22–4.42]   | 0.9830 |
| Prior corticosteroid use, no vs yes                                | 0.00 [0.00–NA]     | 0.9950 |
| Corticosteroid dose, mg/day [range] <sup>b</sup>                   |                    | 0.8975 |
| $<15$ vs $\geq 15$                                                 | 0.61 [0.05–7.05]   |        |
| $<15$ vs other                                                     | 0.86 [0.09–8.04]   |        |
| $\geq 15$ vs other                                                 | 1.41 [0.26–7.71]   |        |
| Tofacitinib dose, PD tofacitinib 10 vs 5 mg BID                    | 14910431 [0.00–NA] | 0.9945 |

213 In total, 1157 patients in the Overall plus P3b/4 [2020] Cohort were included in Cox univariate models; each  
214 covariate was assessed in a separate model; covariates which significantly changed the risk of VTEs are shown  
215 in **bold** text.

216 <sup>a</sup>Median disease duration = 6.3 years.

217 <sup>b</sup>Prednisone equivalent.

218 ALC, absolute lymphocyte count; ANC, absolute neutrophil count; BID, twice daily; BMI, body mass index;

219 CI, confidence interval; HDL, high-density lipoprotein; HR, hazard ratio; MI, myocardial infarction; NA, not

220 available; NMSC, non-melanoma skin cancer; PD, predominant dose; TNFi, tumor necrosis factor inhibitor;

221 VTE, venous thromboembolic event.

222 **Supplementary Table 14.** Univariate regression analysis of risk factors for GI perforations  
 223 in the Overall plus P3b/4 [2020] Cohort

| <b>Covariate</b>                    | <b>HR [95% CI]</b> | <b><i>p</i> value</b> |
|-------------------------------------|--------------------|-----------------------|
| Age, years [10-year increments]     | 0.96 [0.56–1.65]   | 0.8769                |
| Age, years [continuous]             | 1.00 [0.94–1.05]   | 0.8769                |
| Age <65 vs ≥65 years                | 1352036 [0.00–NA]  | 0.9929                |
| Age, years [range]                  |                    | 0.7965                |
| ≥30–<40 vs ≥40–<50                  | 2.49 [0.26–23.95]  |                       |
| ≥30–<40 vs <30                      | 2.34 [0.24–22.49]  |                       |
| ≥30–<40 vs ≥50                      | 1.82 [0.30–10.93]  |                       |
| ≥40–<50 vs <30                      | 0.94 [0.06–15.03]  |                       |
| ≥40–<50 vs ≥50                      | 0.73 [0.07–8.07]   |                       |
| <30 vs ≥50                          | 0.78 [0.07–8.65]   |                       |
| Sex, female vs male                 | 0.58 [0.11–2.98]   | 0.5135                |
| Body weight, kg [continuous]        | 1.03 [0.99–1.07]   | 0.1105                |
| Body weight, kg [<90 vs ≥90]        | 0.46 [0.09–2.36]   | 0.3514                |
| BMI, kg/m <sup>2</sup> [continuous] | 1.05 [0.93–1.19]   | 0.3994                |
| BMI, kg/m <sup>2</sup> [range]      |                    | 0.5098                |
| ≥25–<30 vs <25                      | 0.56 [0.06–5.01]   |                       |
| ≥25–<30 vs ≥30                      | 0.26 [0.02–2.91]   |                       |
| <25 vs ≥30                          | 0.47 [0.09–2.57]   |                       |
| Geographic region                   |                    | 0.8133                |
| North America/Europe/other          |                    |                       |
| North America vs Europe             | 1.49 [0.27–8.16]   |                       |
| North America vs other              | 2.12 [0.19–23.35]  |                       |
| Europe vs other                     | 1.42 [0.16–12.67]  |                       |
| Asia vs Rest of the World           | 0.00 [0.00–NA]     | 0.9941                |
| Race                                |                    |                       |
| Asian vs non-Asian                  | 0.00 [0.00–NA]     | 0.9937                |
| White vs non-White                  | 1.62 [0.19–13.42]  | 0.6572                |
| Race [comparison]                   |                    | 0.7288                |
| Asian vs Black                      | 1.00 [0.00–NA]     |                       |
| Asian vs White                      | 0.00 [0.00–NA]     |                       |
| Asian vs other                      | 0.00 [0.00–NA]     |                       |
| Black vs White                      | 0.00 [0.00–NA]     |                       |
| Black vs other                      | 0.00 [0.00–NA]     |                       |
| Other vs White                      | 3.43 [0.41–28.52]  |                       |
| Smoking status                      |                    | 0.9600                |
| Ex-smoker vs never smoked           | 0.79 [0.15–4.06]   |                       |

|                                                                    |                    |               |
|--------------------------------------------------------------------|--------------------|---------------|
| Ex-smoker vs smoker                                                | 1102507 [0.00–NA]  |               |
| Never smoked vs smoker                                             | 1400010 [0.00–NA]  |               |
| Disease duration, years [ $<6.3$ vs $\geq 6.3$ years] <sup>a</sup> | 0.81 [0.18–3.62]   | 0.7823        |
| Disease duration, years [continuous]                               | 1.05 [0.97–1.13]   | 0.2233        |
| Baseline total Mayo score [continuous]                             | 1.11 [0.73–1.68]   | 0.6304        |
| Baseline total Mayo score, $<9$ vs $\geq 9$                        | 0.54 [0.11–2.81]   | 0.4677        |
| Baseline ALC, cells/mm <sup>3</sup> [continuous]                   | 0.46 [0.14–1.55]   | 0.2120        |
| Baseline ANC, cells/mm <sup>3</sup> [continuous]                   | 0.99 [0.74–1.31]   | 0.9380        |
| <b>Baseline HDL, mg/dL [continuous]</b>                            | 0.91 [0.85–0.98]   | <b>0.0081</b> |
| <b>Baseline HDL <math>&lt;40</math> mg/dL, no vs yes</b>           | 0.19 [0.04–0.85]   | <b>0.0296</b> |
| History of diabetes, no vs yes                                     | 1293308 [0.00–NA]  | 0.9944        |
| History of MI, no vs yes                                           | 456356.6 [0.00–NA] | 0.9943        |
| History of NMSC, no vs yes                                         | 458194.2 [0.00–NA] | 0.9939        |
| Prior immunosuppressant use, no vs yes                             | 0.48 [0.06–4.02]   | 0.5013        |
| Prior TNFi exposure, no vs yes                                     | 0.79 [0.18–3.55]   | 0.7624        |
| Prior TNFi failure, no vs yes                                      | 0.71 [0.16–3.18]   | 0.6532        |
| Baseline corticosteroid use, no vs yes                             | 1.84 [0.36–9.48]   | 0.4675        |
| Prior corticosteroid use, no vs yes                                | 1.71 [0.20–14.18]  | 0.6216        |
| Corticosteroid dose, mg/day [range] <sup>b</sup>                   |                    | 0.8210        |
| $<15$ vs $\geq 15$                                                 | 1.77 [0.11–28.32]  |               |
| $<15$ vs other                                                     | 0.89 [0.10–7.61]   |               |
| $\geq 15$ vs other                                                 | 0.50 [0.06–4.31]   |               |
| Tofacitinib dose, PD tofacitinib 10 vs 5 mg BID                    | 1.83 [0.22–15.27]  | 0.5772        |

224 In total, 1124 patients in the Overall plus P3b/4 [2020] Cohort were included in Cox univariate models; each  
225 covariate was assessed in a separate model; covariates which significantly changed the risk of a GI perforation  
226 are shown in **bold** text.

227 <sup>a</sup>Median disease duration = 6.3 years.

228 <sup>b</sup>Prednisone equivalent.

229 ALC, absolute lymphocyte count; ANC, absolute neutrophil count; BID, twice daily; BMI, body mass index;

230 CI, confidence interval; GI, gastrointestinal; HDL, high-density lipoprotein; HR, hazard ratio; MI, myocardial

231 infarction; NA, not available; NMSC, non-melanoma skin cancer; PD, predominant dose; TNFi, tumor necrosis

232 factor inhibitor.

233 **References**

- 234 1. Sandborn WJ, Ghosh S, Panes J, *et al.* Tofacitinib, an oral janus kinase inhibitor, in  
235 active ulcerative colitis. *N Engl J Med* 2012;**367**:616–24.
- 236 2. Sandborn WJ, Su C, Sands BE, *et al.* Tofacitinib as induction and maintenance  
237 therapy for ulcerative colitis. *N Engl J Med* 2017;**376**:1723–36.
- 238 3. Sandborn WJ, Lawendy N, Danese S, *et al.* Safety and efficacy of tofacitinib for  
239 treatment of ulcerative colitis: Final analysis of octave open, an open-label, long-term  
240 extension study with up to 7.0 years of treatment. *Aliment Pharmacol Ther*  
241 2022;**55**:464–78.
- 242 4. Vermeire S, Su C, Lawendy N, *et al.* Outcomes of tofacitinib dose reduction in  
243 patients with ulcerative colitis in stable remission from the randomised riveting trial. *J*  
244 *Crohns Colitis* 2021;**15**:1130–41.
- 245 5. Sandborn WJ, Panes J, D'Haens GR, *et al.* Safety of tofacitinib for treatment of  
246 ulcerative colitis, based on 4.4 years of data from global clinical trials. *Clinical*  
247 *gastroenterology and hepatology : the official clinical practice journal of the*  
248 *American Gastroenterological Association* 2019;**17**:1541–50.
- 249 6. Colombel J-F, Osterman MT, Thorpe AJ, *et al.* Maintenance of remission with  
250 tofacitinib therapy in patients with ulcerative colitis. *Clin Gastroenterol Hepatol*  
251 2022;**20**:116–25.e5.
- 252 7. Liu GF, Wang J, Liu K, Snavely DB. Confidence intervals for an exposure adjusted  
253 incidence rate difference with applications to clinical trials. *Stat Med* 2006;**25**:1275–  
254 86.
