# Supplementary material for: Tofacitinib for the Treatment of Ulcerative Colitis: An Integrated Summary of up to 7.8 Years of Safety Data from the Global Clinical Programme
Source: PubMed Central journal article supplement — J Crohns Colitis. 2022 Sep 17;17(3):338–51. doi: 10.1093/ecco-jcc/jjac141 (PMC10069618; doi:10.1093/ecco-jcc/jjac141), 2022-09-17
Supplement: jjac141_suppl_supplementary_figure_s1.pdf [file jjac141_suppl_supplementary_figure_s1.pdf]

## Supplementary Figure 1. Study design and analysis cohorts

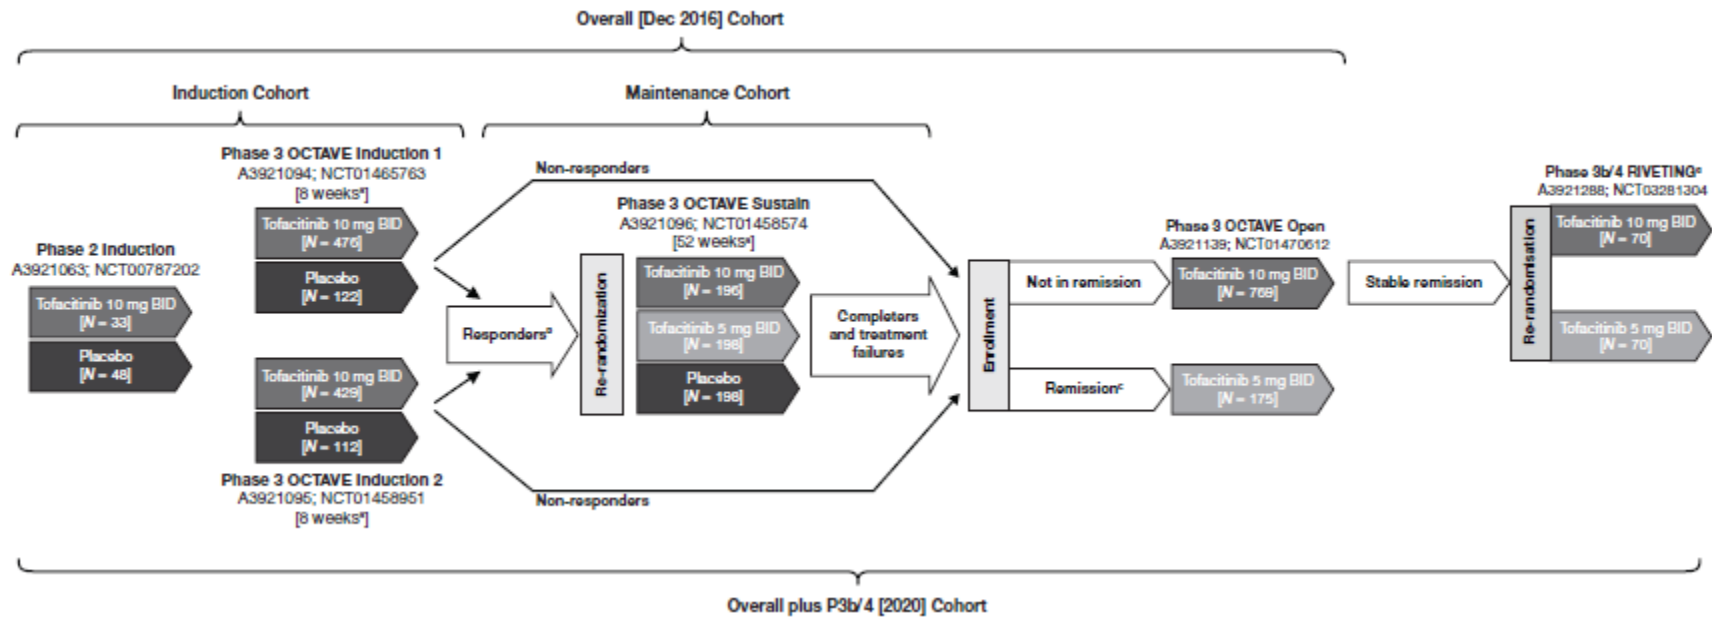

Adapted from Winthrop et al 2018 [in accordance with the CC BY-NC license];<sup>10</sup> the Overall [Dec 2016] Cohort includes data from OCTAVE Open, as of December 16, 2016 [total tofacitinib exposure  $\leq 4.4$  years]; the Overall plus P3b/4 [2020] Cohort includes final data from OCTAVE Open [final data cut-off: August 24, 2020], and data from RIVETING [interim data cut-off: February 20, 2020;  $\leq 7.8$  years].

<sup>a</sup>Final complete efficacy assessment at Week 8/52. Treatment continued up to Week 9/53.

<sup>b</sup>Clinical response in OCTAVE Induction 1 and 2 was defined as a decrease from baseline total Mayo score of  $\geq 3$  points and  $\geq 30\%$ , plus a decrease in rectal bleeding subscore of  $\geq 1$  point or an absolute rectal bleeding subscore of 0 or 1.

<sup>c</sup>Treatment failure was defined as a  $\geq 3$ -point increase in total Mayo score from baseline of OCTAVE Sustain, along with a  $\geq 1$ -point increase in rectal bleeding and

endoscopic subscores after a minimum of 8 weeks of treatment.

<sup>d</sup>Remission was defined as a total Mayo score of  $\leq 2$  with no individual subscore  $>1$ , and a rectal bleeding subscore of 0.

<sup>e</sup>Patients entering RIVETING had previously received tofacitinib 10 mg BID for  $\geq 2$  consecutive years in OCTAVE Open, were in stable remission for  $\geq 6$  months prior to baseline, and had not received corticosteroids for UC for  $\geq 4$  weeks prior to baseline.

BID, twice daily; N, number of patients treated in the treatment group; UC, ulcerative colitis.
