# Supplementary material for: Tofacitinib for the Treatment of Ulcerative Colitis: An Integrated Summary of up to 7.8 Years of Safety Data from the Global Clinical Programme
Source: PubMed Central journal article supplement — J Crohns Colitis. 2022 Sep 17;17(3):338–51. doi: 10.1093/ecco-jcc/jjac141 (PMC10069618; doi:10.1093/ecco-jcc/jjac141), 2022-09-17
Supplement: jjac141_suppl_supplementary_figure_s2.pdf [file jjac141_suppl_supplementary_figure_s2.pdf]

**Supplementary Figure 2.** Risk factors for [A] serious infections,<sup>a</sup> [B] opportunistic infections,<sup>a</sup> [C] malignancies [excluding NMSC],<sup>b</sup> [D] NMSC,<sup>b</sup> [E] MACE,<sup>b</sup> [F] VTEs,<sup>a,c</sup> and [G] GI perforations,<sup>b</sup> by multivariable regression analysis [stepwise selection] in the Overall plus P3b/4 [2020] Cohort

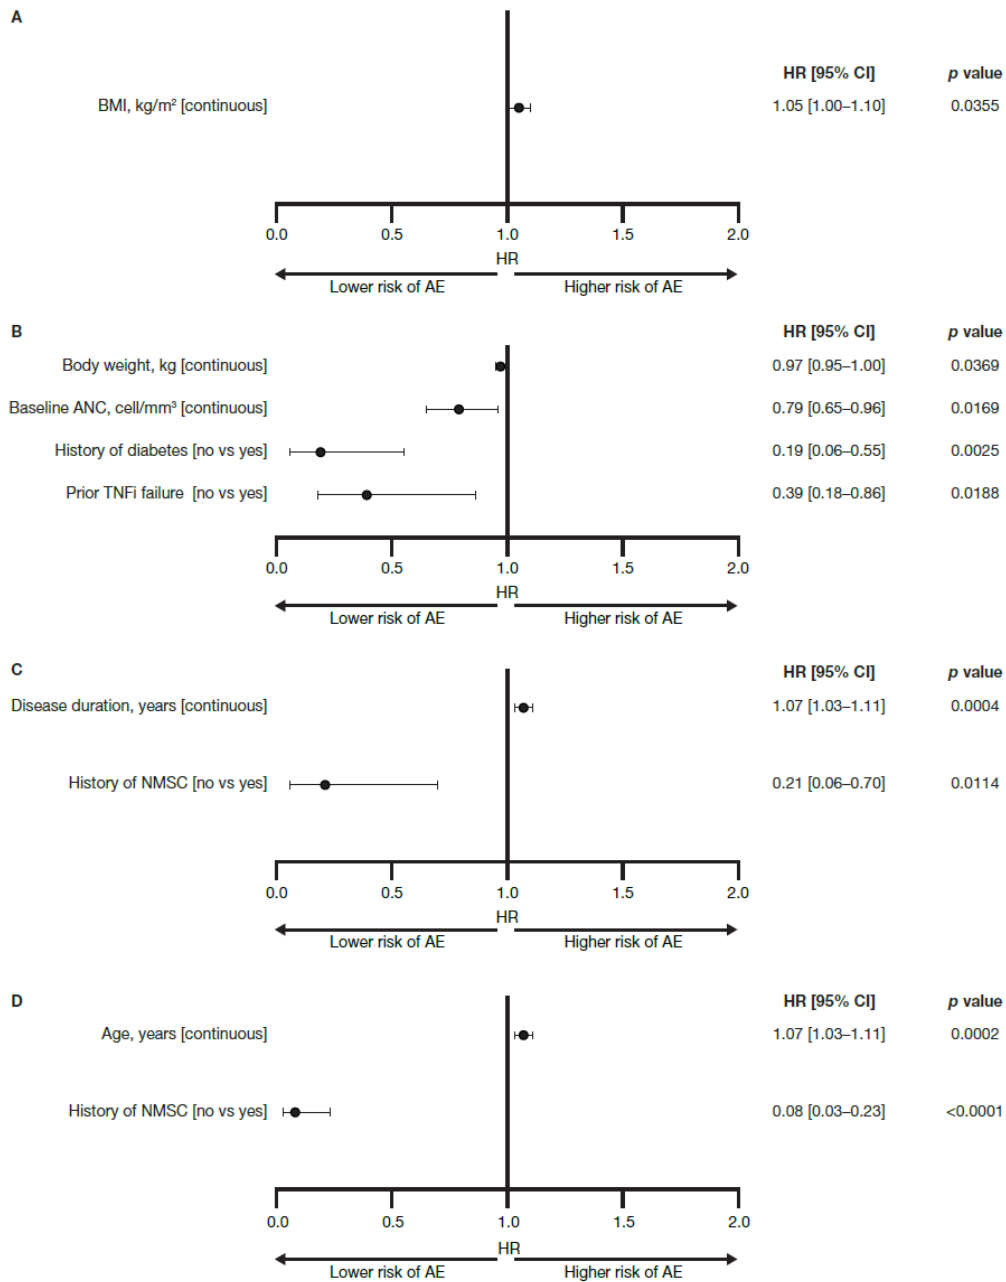

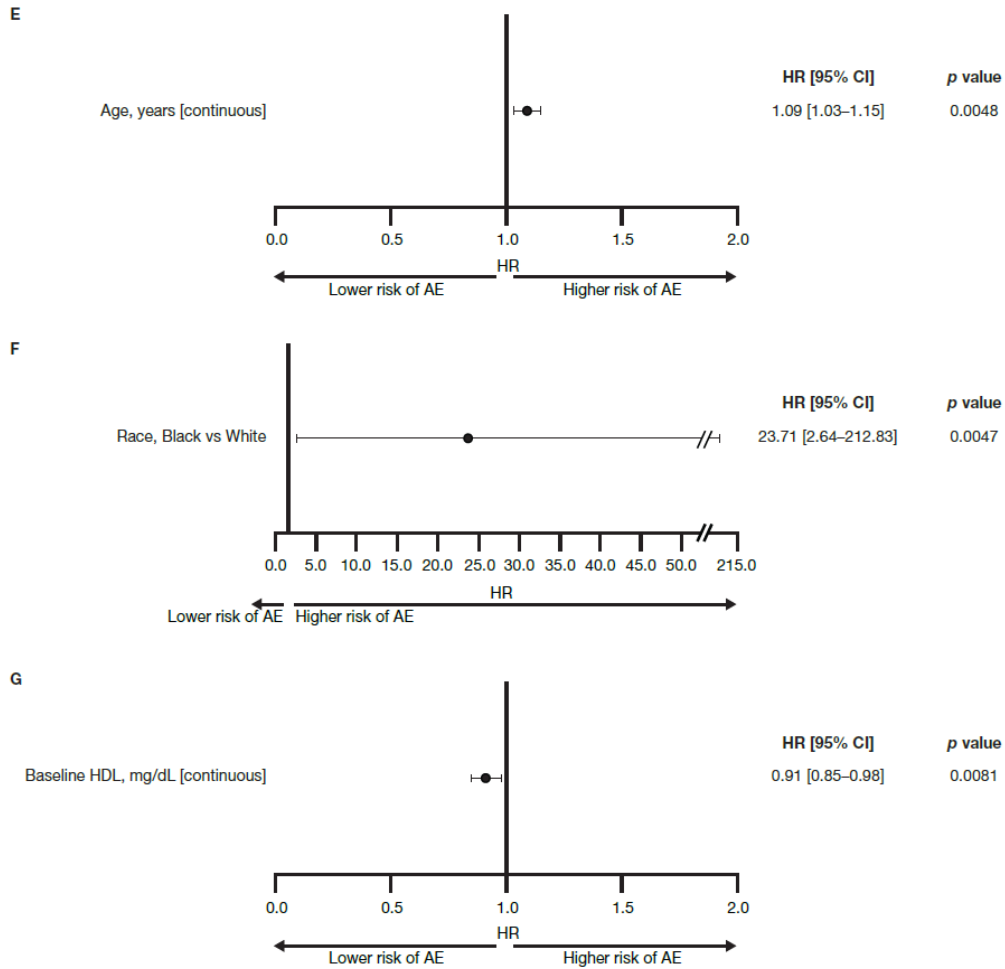

Covariates were selected by multivariable regression analysis [stepwise selection].

<sup>a</sup>In total, 1157 patients in the Overall plus P3b/4 [2020] Cohort were included.

<sup>b</sup>Adjudicated event; in total, 1124 patients in the Overall plus P3b/4 [2020] Cohort were included.

<sup>c</sup>VTEs included adjudicated events from OCTAVE Open and RIVETING plus selected events from phase 2/3 studies from the Narrow Standardized MedDRA query for embolic and thrombotic events.

AE, adverse event; ANC, absolute neutrophil count; BMI, body mass index; CI, confidence interval;

GI, gastrointestinal; HDL, high-density lipoprotein; HR, hazard ratio; MACE, major adverse cardiovascular

events; MedDRA, Medical Dictionary for Regulatory Activities; NMSC, non-melanoma skin cancer;

TNFi, tumor necrosis factor inhibitor; VTE, venous thromboembolic event.
